# Supplementary material for: Reductive Evolution and Diversification of C5-Uracil Methylation in the Nucleic Acids of Mollicutes
Source: Preprints.org preprint supplement (doi:10.20944/preprints202003.0097.v1), 2020-03-06
Supplement: Supplementary file 1 [file supplementary]

## Sheet: Feuil1
Table S1: List of 39 selected mollicutes with some genomics and phenotypic features
Phylogenetic group	Mycoplasma speciesa	Strain	Natural Host	Genome size (Mbp)	% G+C	# CDS	Cultivability	GenBank #
Spiroplasma	M. capricolum subsp. capripneumoniae	99108-P1	Ruminant	1.006	23.6	693	Yes	PRJNA164785
	M. leachii	PG50	Ruminant	1.009	23.7	883	Yes	CP002108.1
	M. mycoides subsp. mycoides	PG1	Ruminant	1.212	24.0	917	Yes	BX293980.2
	M. mycoides subsp. capri	95010	Ruminant	1.154	23.8	921	Yes	FQ377874.1
	M. capricolum subsp. capricolum	ATCC27343	Ruminant	1.010	23.8	817	Yes	CP000123.1
	M. yeatsii	13926-cl	Ruminant	0.897	25.8	687	Yes	AORK00000000
	M. putrefaciens	CIRAD	Ruminant	0.860	27.0	684	Yes	CP004357.1
	Mesoplasma florum	L1	Plants	0.793	27.0	683	Yes	AE017263.1
	Spiroplasma citri	GII-3	Insects&plants	1.840	26.0	2050	Yes	PRJNA13930
Hominis	M. auris	15026-cl	Ruminant	0.768	27.2	616	Yes	AORI00000000
	M. alkalescens	1418-cl	Ruminant	0.772	25.6	601	Yes	AMWK00000000
	M. arginini	7264-cl	Ruminant	0.616	26.2	513	Yes	AORG00000000
	M. arthritidis	158L3-1	Rodent	0.820	30.7	631	Yes	CP001047.1
	M. hominis	PG21	Human	0.665	27.1	531	Yes	FP236530.1
	M. mobile	163K	Fish	0.777	25.0	637	Yes	AE017308.1
	M. hyorhinis	HUB-1	Pig	0.840	25.9	663	Yes	CP002170.1
	M. ovipneumoniae	cl-14811	Ruminant	1.071	29.2	685	Yes	PRJNA164759
	M. hyopneumoniae	232	Pig	0.893	28.6	695	Yes	AE017332.1
	M. pulmonis	UAB CTIP	Rodent	0.964	26.6	783	Yes	AL445566.1
	M. synoviae	53	Poultry	0.799	28.5	675	Yes	AE017245.1
	M. crocodyli	MP145	Crocodilians	0.934	26.9	697	Yes	CP001991.1
	M. fermentans	JER	Human	0.977	26.9	799	Yes	CP001995.1
	M. bovigenitalium	cl-51080	Ruminant	0.862	29.0	677	Yes	AORH00000000
	M. bovis	PG45	Ruminant	1.003	29.3	766	Yes	CP002188.1
	M. agalactiae	PG2	Ruminant	0.877	29.7	714	Yes	CU179680.1
Pneumoniae	Ureaplasma diversum	246	Ruminant	1.011	28.1	675	Yes	PRJNA164765
	U. parvum	ATCC700970	Human	0.752	25.5	614	Yes	AF222894.1
	U. urealyticum	ATCC 33699	Human	0.874	25.8	647	Yes	CP001184.1
	M. penetrans	HF2	Human	1.359	25.7	1040	Yes	BA000026.2
	M. pneumoniae	M129	Human	0.816	40.0	689	Yes	U00089.2
	M . genitalium	G37	Human	0.580	32.0	482	Yes	L43967.2
	M. gallisepticum	R (Low)	Poultry	0.996	31.4	727	Yes	AE015450.2
	M. haemofelis	Langford	Cat	1.147	38.8	1545	No	FR773153.2
	M. haemocanis	Illinois	Dog	0.920	35.3	1156	No	CP003199.1
	M. suis	KI3806	Pig	0.709	31.1	799	No	FQ790233.1
Acholeplasma/Phytoplasma	Candidatus Phytoplasma mali	AT	Insect&plant	0.602	21.4	480	No	CU469464.1
	Candidatus Phytoplasma australiense	rp-A	Insect&plant	0.880	27.4	844	No	AM422018.1
	Candidatus Phytoplasma asteris	Yellows	Insect&plant	0.707	26.8	694	No	AP006628.2
	Acholeplasma laidlawii	PG-8A	Ubiquitous	1.497	31.9	1380	Yes	CP000896.1
