# Supplementary material for: Reductive Evolution and Diversification of C5-Uracil Methylation in the Nucleic Acids of Mollicutes
Source: Preprints.org preprint supplement (doi:10.20944/preprints202003.0097.v1), 2020-03-06
Supplement: Supplementary file 3 [file Table S2.xlsx]

## Sheet: ordered
Table S2. Homologs of tRNA and rRNA modification enzymes and some other folate and S-AdoMet dependent enzymes in mollicutes
	TRMFO	TRMA	RLMFO	TRMFO-like (2)	RLMC	RLMD (RUMA, YGCA)	RLMCD (yerS, yefA)	YFJO	YFJO-like	THYA	TDK	THYX	POLB
PRODUCT	methyltransferase	tRNA m5U54 methyltransferase	methyltransferase	methyltransferase	23S rRNA m5U747 methyltransferase	23S rRNA m5U1939 methyltransferase	methyltransferase	methyltransferase	methyltransferase	Thymidilate synthase A	Thymidine kinase	Flavin-dependent thymidylate synthase	FAD-dependent thymidylate synthase
COENZYME	FAD	none	FAD	FAD	none	none	none	none	none	none	none	FAD	FAD
CARBON DONOR	CH2THF	S-AdoMet	CH2THF	CH2THF	S-AdoMet	S-AdoMet	S-AdoMet	S-AdoMet	S-AdoMet	CH2THF	S-AdoMet	CH2THF	THF
REDUCING AGENT	NAD(P)H	none	NAD(P)H	?	none	none	none	none	none	none	none	NAD(P)H	NAD(P)H
TARGET and MODIFICATION	tRNA m5U54	tRNA m5U54	23S rRNA m5U1939	?	23S rRNA m5U747	23S rRNA m5U1939	23S rRNA m5U747+1939	?	?	dUMP	thymidinie	dUMP, UMP	dUMP, UMP
E. coli K12 MG1655	no	b3965	no	no	b0859	b2785	no	no	no	no b2827???	b1238	no	no
B. subtilis168	BSU16130	no	no	no	no	no	BSU06730	BSU08020	no	BSU21820	BSU37060	no	no
Mycoplasma capricolum subsp. capripneumoniae 99108-P1	no	no	pseudo (b)	Mccp_s01_2410	no	no	no	no	no	no	Mccp_s01_6650	no	no
Mycoplasma capricolum subsp. capricolum ATCC 27343	no	no	MCAP0476	MCAP0613	no	no	no	no	no	no	MCAP0143	no	no
Mycoplasma leachii PG50	no	no	MSB_A0489	MSB_A0618	no	no	no	no	no	no	MSB_A0193	no	no
Mycoplasma mycoides subsp. mycoides SC PG1	no	no	MSC_0494	MSC_0375	no	no	no	no	no	no	MSC_0149	no	no
Mycoplasma mycoides subsp. capri 95010	no	no	MLC_4740	MLC_3470	no	no	no	no	no	no	MLC_1320	no	no
Mycoplasma yeatsii 13926-cl	Myea_s02_1060	no	Myea_s02_6390	Myea_s02_0100	no	no	no	no	no	Myea_s02_0910	Myea_s02_4310	no	no
Mycoplasma putrefaciens	MPUT3940	no	MPUT4900	MPUT1810	no	no	no	no	no	no	MPUT0450	no	no
Mesoplasma florum L1	Mfl532	no	Mfl242	no	no	no	no	no	no	Mfl419	mfl635	no	no
Spiroplasma citri G II-3	pseudo (a)	no	pseudo (a)	no	no	no	no	no	no	SPICI03_290	SPICI1B_039	no	no
Mycoplasma auris 15026-cl	no	no	no	no	no	Maur_s01_0930	no	no	no	no	Maur_s01_4380	no	no
Mycoplasma alkalescens 14918-cl	no	no	no	no	no	pseudo	no	no	no	no	Malk_s01_6320	no	no
Mycoplasma arginini 7264-cl	no	no	no	no	no	Marg_s01_3420	no	no	no	no	Marg_s01_1590	no	no
Mycoplasma hominis PG21	no	no	no	no	no	MHO_4570	no	no	no	no	MHO_0550	no	no
Mycoplasma arthritidis 158L3-1	no	no	no	no	no	MARTH_orf754	no	no	no	no	MARTH_orf165	no	no
Mycoplasma ovipneumoniae cl-14811	no	no	no	no	no	no	no	no	no	no	Movi_s03_0380	no	no
Mycoplasma hyopneumoniae 232	no	no	no	no	no	no	no	no	no	no	mhp627	no	no
Mycoplasma hyorhinis HUB-1	no	no	no	no	no	pseudo (c)	no	no	no	MHR_0661	MHR_0620	no	no
Mycoplasma mobile 163K	no	no	no	no	no	MMOB5020	no	no	no	MMOB0340	MMOB6150	no	no
Mycoplasma bovis PG45	no	no	no	MBOVPG45_0161	no	MBOVPG45_0757	no	no	no	no	MBOVPG45_0801	no	no
Mycoplasma agalactiae PG2	no	no	no	MAG1470	no	MAG6630	no	no	no	no	MAG7010	no	no
Mycoplasma fermentans JER	no	no	no	no	no	MFE_00910	no	no	no	no	MFE_07520	no	no
Mycoplasma bovigenitalium cl-51080	no	no	no	no	no	Mbvg_s01_3560	no	no	no	no	no	no	no
Mycoplasma crocodyli MP145	no	no	no	no	no	MCRO_0637	no	no	no	MCRO_0751	MCRO_0561	no	no
Mycoplasma synoviae 53	no	no	no	no	no	MS53_0111	no	no	no	MS53_0398	MS53_0521	no	no
Mycoplasma pulmonis UAB CTIP	no	no	no	no	no	no	no	no	no	MYPU_5380	MYPU_1450	no	no
Ureaplasma parvum serovar 3 ATCC 700970	no	no	no	no	no	no	no	no	no	no	UU594	no	no
Ureaplasma urealyticum Western serovar 10 ATCC 33699	no	no	no	no	no	no	no	no	no	no	UUR10_0699	no	no
Ureaplasma diversum 246	no	no	no	no	no	no	no	no	no	no	Udiv_s31_0110	no	no
Mycoplasma penetrans HF-2	no	no	no	no	no	no	no	no	no	MYPE6870	MYPE10320	no	no
Mycoplasma genitalium G37	no	no	no	no	no	no	no	no	no	MG227	MG034	no	no
Mycoplasma pneumoniae M129	no	no	no	no	no	no	no	no	no	MPN320	MPN044	no	no
Mycoplasma gallisepticum R (low)	no	no	no	no	no	no	no	no	no	MGA_0699	MGA_0502	no	no
Mycoplasma haemocanis Illinois	no	no	no	no	no	no	no	no	no	no	MHC_05755	no	no
Mycoplasma haemofelis Langford 1	no	no	no	no	no	no	no	no	no	no	HF1_15280	no	no
Mycoplasma suis KI3806	no	no	no	no	no	no	no	no	no	no	MSUIS_00520	no	no
Phytoplasma australiense	no	no	no	no	no	no	no	no	no	PA0084	PA0713	no	no
Phytoplasma asteris Onion Yellows strain	no	no	no	no	no	no	no	no	no	PAM293	PAM104	no	no
Phytoplasma mali AT	no	no	no	no	no	no	no	no	no	ATP_00320	ATP_00140	no	no
Acholeplasma laidlawii PG-8A	ACL_1161 (probably)	no	no	no	no	ACL_0569	no	no	ACL_0440, ACL_0509, ACL_0513	ACL_0691	ACL_0058	no	no
(a) confirmed pseudogene in S. citri GII-3. Complete in some other Spiroplasma species
(b) pseudogene in strains 99108, Abomsa, 87001 and ILRI181 but complete in strains 1601 and F38
(c) pseudogene in strain HUB-1. Complete in other strains (MCLD, GDL-1, SK76, DBS1050, MDBK).
Color code: Red, THF dependent enzyme; green, S-AdoMet dependent enzyme; yellow, predicted pseudogen
