# Supplementary material for: Reductive Evolution and Diversification of C5-Uracil Methylation in the Nucleic Acids of Mollicutes
Source: Preprints.org preprint supplement (doi:10.20944/preprints202003.0097.v1), 2020-03-06
Supplement: Supplementary file 4 [file Table S3.xlsx]

## Sheet: Feuil1
Table S3. Supplementary proteins used for phylogenetic analyses
RLMD/RLMCD/YFJO homologs
Name in Fig. S6	Accession number
Acholeplasma hippikon 1	WP_035368850.1
Acholeplasma oculi 1	CDR30591.1
Acholeplasma equifetale 1	WP_026399772.1
Acholeplasma palmae 1	CDR30591.1
Acholeplasma granularum 1	WP_025724737.1
Acholeplasma palmae 2	WP_026659293.1
Acholeplasma equifetale 2	WP_035357977.1
Acholeplasma hippikon 2	WP_035369805.1
Acholeplasma oculi 2	CDR30781.1
Acholeplasma granularum 2	WP_035357210.1
Acholeplasma equifetale 3	WP_026399446.1
Acholeplasma palmae 3	WP_026661030.1
Acholeplasma hippikon 3	WP_035369124.1
Acholeplasma oculi 3	CDR30730.1
Acholeplasma palmae 4	WP_030003523.1
Acholeplasma hippikon 4	WP_035369116.1
Acholeplasma equifetale 4	WP_035357950.1
Acholeplasma oculi 4	CDR30726.1
Acholeplasma granularum 4	WP_025724889.1
