# Supplementary material for: Reductive Evolution and Diversification of C5-Uracil Methylation in the Nucleic Acids of Mollicutes
Source: Preprints.org preprint supplement (doi:10.20944/preprints202003.0097.v1), 2020-03-06
Supplement: Supplementary file 5 [file Table S4.docx]

**Table S4. GMQE and QMEAN values for TrmFO-like proteins models generated by Swiss-model using PDB:3G5S as a template.**

| **Organism** | **Identity with *Tt*TrmFO (%)** | **GMQE** | **QMEAN** |
| --- | --- | --- | --- |
| *M. capricolum* | 29.4 | 0.68 | -3.22 |
| *M. mycoides* | 30.7 | 0.68 | -3.35 |
| *M. yeatsii* | 31.6 | 0.69 | -3.09 |
| *M. putrefaciens* | 31.7 | 0.68 | -2.92 |
| *M. bovis* | 30.6 | 0.69 | -3.22 |
| *M. agalactiae* | 32.3 | 0.69 | -3.55 |
