# Supplementary material for: Reductive Evolution and Diversification of C5-Uracil Methylation in the Nucleic Acids of Mollicutes
Source: Preprints.org preprint supplement (doi:10.20944/preprints202003.0097.v1), 2020-03-06
Supplement: Supplementary file 13 [file supplementary]

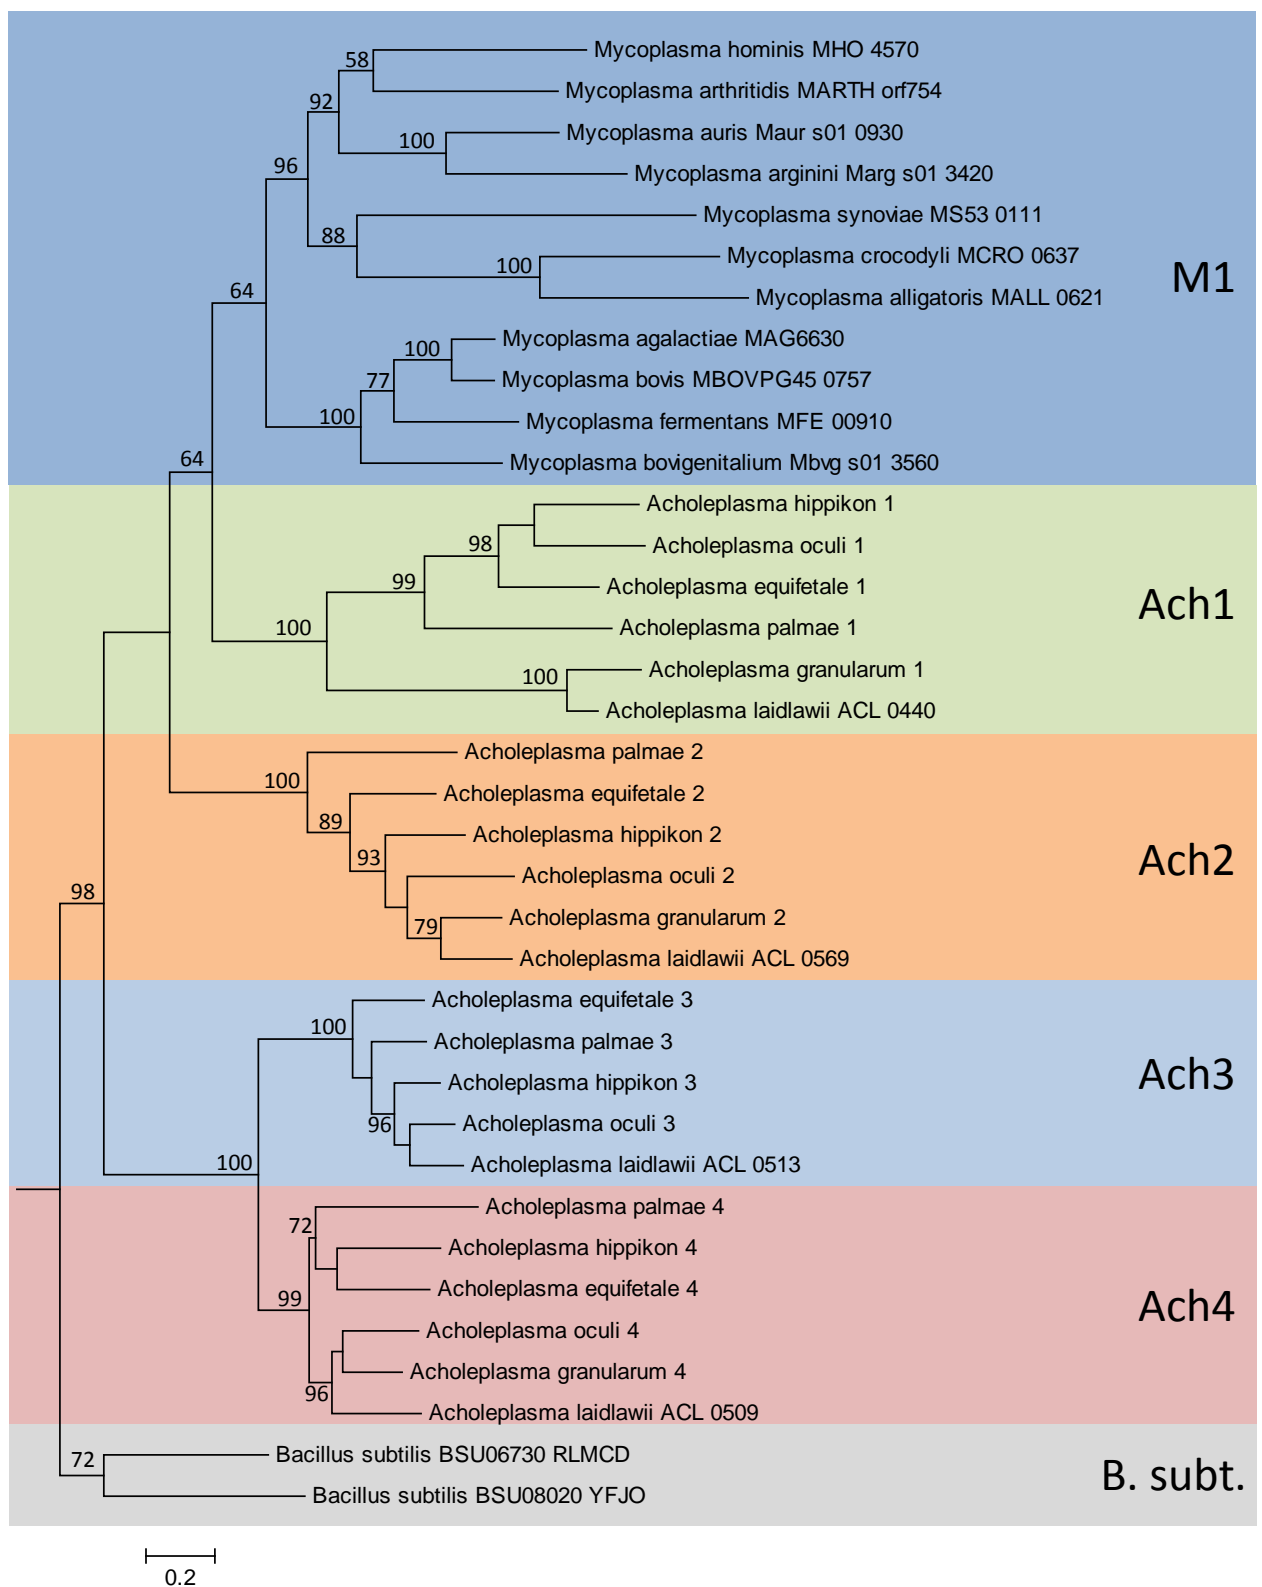

**Figure 3.** Phylogenetic analysis of RImD/RImCD/YfjO- related CDS in mollicutes. Alignment was obtained with MUSCLE and phylogenetic tree was inferred using the maximum likelihood method using the PhyML programme implemented in phylogeny.fr. Statistical aLRT values >50% are indicated on nodes. Main groups of homologs identified are indicated.
