# Supplementary material for: Reductive Evolution and Diversification of C5-Uracil Methylation in the Nucleic Acids of Mollicutes
Source: Preprints.org preprint supplement (doi:10.20944/preprints202003.0097.v1), 2020-03-06
Supplement: Supplementary file 16 [file supplementary]

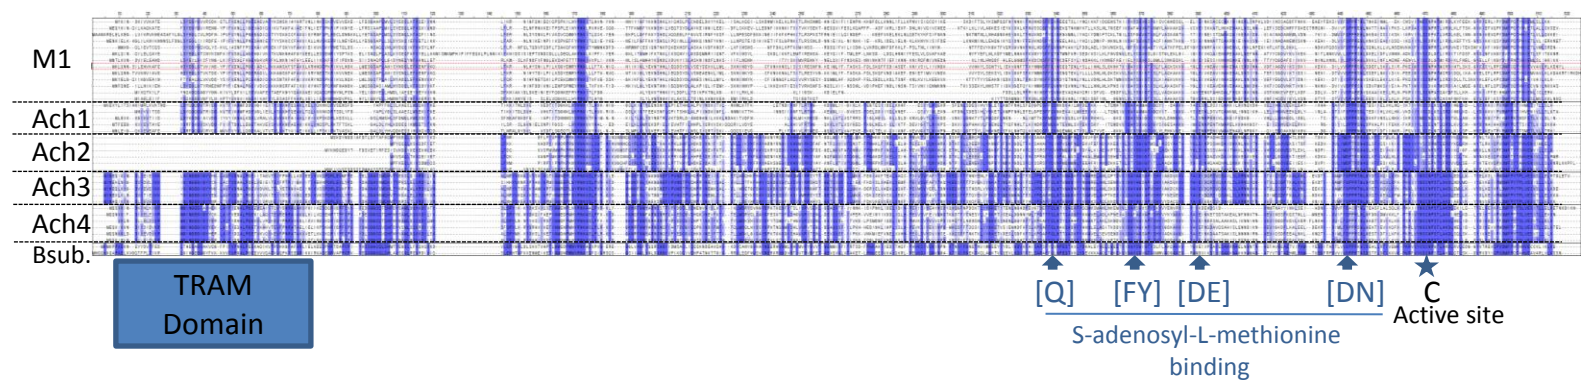

**Figure S9.** Conserved cysteines in RlmD-related homologs. Multiple alignment used for the construction of the phylogenetic tree presented Figure 3 was implemented into Jalview to get an overview of the conserved positions. Amino-acids conserved at >50% are indicated in blue. Functionnal domain TRAM and important amino-acids are indicated underneath the alignment.
