# Supplementary figures and images for: Reductive Evolution and Diversification of C5-Uracil Methylation in the Nucleic Acids of Mollicutes
Source: Preprints.org preprint supplement (doi:10.20944/preprints202003.0097.v1), 2020-03-06

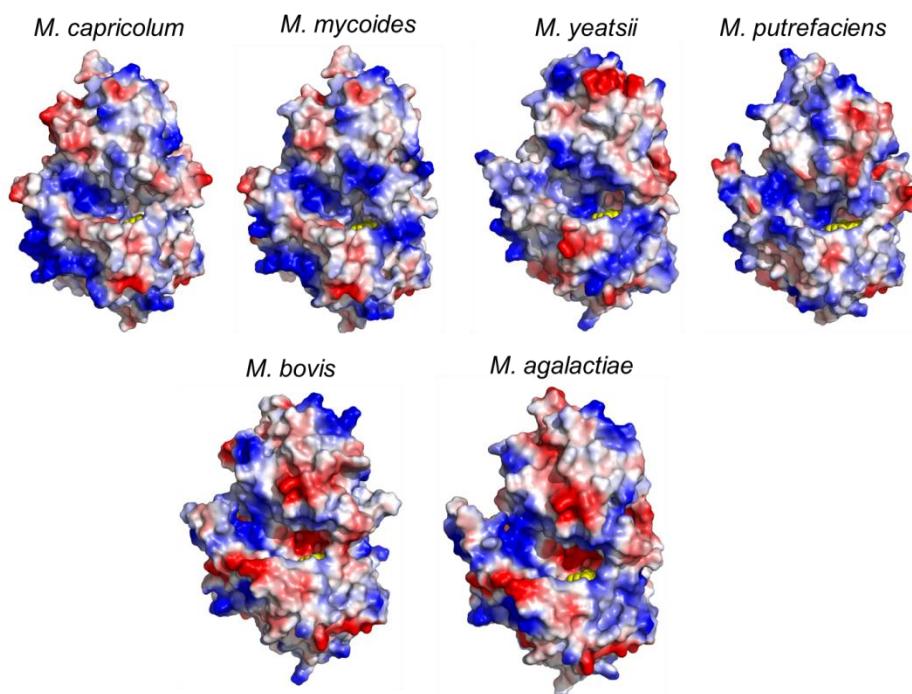

**Figure S8.** Electrostatic surface of model of TrmFO-like proteins from different mycoplasma.

Supplement: Supplementary file 18 [file supplementary]
